# The Use of Wastewater Surveillance to Estimate SARS-CoV-2 Fecal Viral Shedding Pattern and Identify Time Periods with Intensified Transmission

Wan Yang,<sup>1\*</sup> Enoma Omoregie,<sup>2</sup> Aaron Olsen,<sup>2</sup> Elizabeth A. Watts,<sup>2,3</sup> Hilary Parton,<sup>2</sup> Ellen Lee<sup>2</sup>

<sup>1</sup>Department of Epidemiology, Columbia University, New York, NY, USA; <sup>2</sup>New York City Department of Health and Mental Hygiene, Queens, NY, USA; <sup>3</sup>Centers for Disease Control and Prevention, Atlanta, GA, USA

\*Correspondence to: [wy2202@cumc.columbia.edu](mailto:wy2202@cumc.columbia.edu)

## ABSTRACT

**Background:** Wastewater-based surveillance is an important tool for monitoring the COVID-19 pandemic. However, it remains challenging to translate wastewater SARS-CoV-2 viral load to infection number, due to unclear shedding patterns in wastewater and potential differences between variants.

**Objectives:** We utilized comprehensive wastewater surveillance data and estimates of infection prevalence (i.e., the source of the viral shedding) available for New York City (NYC) to characterize SARS-CoV-2 fecal shedding pattern over multiple COVID-19 waves.

**Methods:** We collected SARS-CoV-2 viral wastewater measurements in NYC during August 31, 2020 – August 29, 2023 ( $N = 3794$  samples). Combining with estimates of infection prevalence (number of infectious individuals including those not detected as cases), we estimated the time-lag, duration, and per-infection fecal shedding rate for the ancestral/Iota, Delta, and Omicron variants, separately. We also developed a procedure to identify occasions with intensified transmission.

**Results:** Models suggested fecal viral shedding likely starts around the same time as and lasts slightly longer than respiratory tract shedding. Estimated fecal viral shedding rate was highest during the ancestral/Iota variant wave, at 1.44 (95% CI: 1.35 – 1.53) billion RNA copies in wastewater per day per infection (measured by RT-qPCR), and decreased by ~20% and 50-60% during the Delta wave and Omicron period, respectively. We identified around 200 occasions during which the wastewater SARS-CoV-2 viral load exceeded the expected level in any of 14 sewersheds. These anomalies disproportionately occurred during late January, late April - early May, early August, and from late-November to late-December, with frequencies exceeding the expectation assuming random occurrence ( $P < 0.05$ ; bootstrapping test).

**Discussion:** These estimates may be useful in understanding changes in underlying infection rate and help quantify changes in COVID-19 transmission and severity over time. We have also demonstrated that wastewater surveillance data can support the identification of time periods with potentially intensified transmission.

39  
40  
41  
42  
43  
44  
45  
46  
47  
48  
49  
50  
51  
52  
53  
54  
55  
56  
57  
58  
59  
60  
61  
62  
63  
64  
65  
66  
67  
68  
69  
70  
71  
72  
73  
74  
75  
76

## INTRODUCTION

Since the early phase of the COVID-19 pandemic, studies have reported that wastewater SARS-CoV-2 viral loads often closely track or lead case and/or hospitalization trajectories and, as such, can serve as a cost-effective surveillance tool for monitoring the COVID-19 pandemic.<sup>1-5</sup> Thus, wastewater-based surveillance systems have been built worldwide on local and national scales. With decreasing clinical testing and genomic sequencing,<sup>6,7</sup> there has been increased interest in wastewater surveillance, given results are generated independently of clinical testing practice.

Though there are advantages of SARS-CoV-2 wastewater surveillance, a large US national survey of public health agencies completed in 2022 noted the results were often deemed supplementary to surveillance involving clinical laboratory tests.<sup>8</sup> One of the hurdles is that while the trends could indicate changes in SARS-CoV-2 community circulation, it remains challenging to directly translate wastewater SARS-CoV-2 viral loads to a specific number of infections in the population, due to the unclear fecal viral shedding rate (after accounting for the recovery rate of virus genomes) in wastewater samples. In addition, with the fast emergence and turnover of new SARS-CoV-2 variants, it is unclear how fecal shedding of the virus may have altered over time by variant. To address these questions, we utilize comprehensive wastewater surveillance data and estimates of infection prevalence (i.e., the source of the viral shedding) available for New York City (NYC) to characterize SARS-CoV-2 fecal shedding over multiple COVID-19 pandemic and epidemic waves.

NYC experienced the earliest pandemic wave in the United States (US), and shortly after the initial wave, established a wastewater surveillance program that covers all of its 14 sewersheds which serve over 8 million residents.<sup>2</sup> Since August 31, 2020, the program has continuously measured SARS-CoV-2 viral load weekly. Independently, we have developed and used a comprehensive model-inference system – calibrated to case, emergency department (ED) visit, and mortality data – to reconstruct the underlying transmission dynamics and estimate key epidemiological characteristics.<sup>9,10</sup> In particular, the model-inference system estimates the number of infectious individuals including those not detected as cases (i.e., infection prevalence) in each of the city’s 42 neighborhoods during each week since March 1, 2020.<sup>9,10</sup> Combining the wastewater SARS-CoV-2 viral load data and infection prevalence estimates over a 3-year period (i.e., August 31, 2020 – August 29, 2023), we are able to characterize the viral shedding pattern (i.e., time-lag, duration, and *per-infection* shedding rate) for the ancestral/Iota, Delta, and Omicron variants, separately. We are also able to identify time periods with greater transmission.

## 77 **METHODS**

### 78 **SARS-CoV-2 wastewater surveillance data.**

79 The SARS-CoV-2 wastewater surveillance program in NYC started on August 31, 2020.  
80 Wastewater samples were taken at each of the city's 14 wastewater treatment plants, usually  
81 twice per week on Sundays and Tuesdays ( $N = 3794$  samples; see variations and details in Table  
82 S1). SARS-CoV-2 RNA concentration was measured using quantitative reverse transcription  
83 polymerase chain reaction (RT-qPCR) assays during August 31, 2020, through April 11, 2023,  
84 and reverse transcription digital PCR (RT-dPCR) assays from November 1, 2022, through August  
85 29, 2023. All measurements adjusted for sewershed-specific flow rate and service population  
86 size. Specifically, per-capita SARS-CoV-2 viral load (RNA copies per day per population) was  
87 computed as the viral concentration measure multiplied by the daily sewage flow rate and then  
88 divided by the service population.

89  
90 For weeks after April 11, 2023, when the samples were measured using RT-dPCR alone, we  
91 converted the RT-dPCR measurements to RT-qPCR equivalents, to allow characterization of  
92 SARS-CoV-2 viral shedding during the entire Omicron period. Specifically, we first computed the  
93 conversion ratio using measurements from November 1, 2022, through April 11, 2023, when  
94 both assays were conducted, simply as the mean of all RT-qPCR measurements dividing the  
95 mean of all RT-dPCR measurements, during these weeks. We then multiplied the RT-dPCR  
96 measurements by the conversion ratio to obtain the converted RT-qPCR equivalents. As an  
97 alternative, we stratified the data by sewershed and performed the conversion using  
98 sewershed-specific conversion ratios (see Sensitivity Analysis). In addition, the RT-qPCR and RT-  
99 dPCR measures differed substantially (by a factor of 16.7 based on the aforementioned  
100 overlapping measurements), likely due to difference in methodology.<sup>11</sup> To facilitate comparison  
101 with studies primarily using RT-dPCR, we also converted all RT-qPCR measurements to RT-dPCR  
102 equivalents when reporting the viral shedding rates.

### 103 104 **SARS-CoV-2 infection prevalence estimates.**

105 Estimated SARS-CoV-2 infection prevalence came from a model-inference system,<sup>12</sup>  
106 independent of the wastewater surveillance data. Briefly, the model-inference system fit a  
107 neighborhood-level Susceptible-Exposed-Infectious-(re)Susceptible-Vaccination (SEIRSV) model  
108 to age-grouped, neighborhood-specific COVID-19 case, ED visit, and mortality data, accounting  
109 for concurrent nonpharmaceutical interventions, vaccinations, under-detection of infection,  
110 and seasonal changes. We used the SEIRSV model to explicitly simulate the number of  
111 infectious individuals – i.e., anyone who can actively transmit SARS-CoV-2 and infect others  
112 regardless of symptoms and test-seeking behaviors – present in the population and estimated  
113 this infection prevalence during each week using the full model-inference system using COVID-  
114 19 case, ED visit, and mortality data.<sup>12</sup> That is, similar to the wastewater SARS-CoV-2 viral loads

115 measuring the total population fecal shedding regardless of clinical testing, estimated infection  
116 prevalence here included all individuals actively transmitting SARS-CoV-2 (primarily via  
117 shedding from the respiratory tracts) regardless of whether they were detected as cases.

118  
119 The infection prevalence estimates are United Hospital Fund neighborhood-<sup>13</sup> and age group  
120 specific, and available for each week starting March 1, 2020 (the pandemic onset in NYC) to the  
121 week starting August 27, 2023. To match with the sewershed-level wastewater SARS-CoV-2  
122 viral load data, we first mapped each neighborhood (42 in total vs. 14 sewersheds) to the  
123 corresponding sewershed based on geolocation; if a neighborhood overlapped multiple  
124 sewersheds, we assigned it to the one with the maximal overlap. For each sewershed and  
125 week, we then aggregated all estimated infectious individuals from all related neighborhoods.

126  
127 **Estimating the fecal viral shedding time-lag, duration, and rate.**

128 To analyze the fecal viral shedding pattern by variant, we defined three time periods based on  
129 data availability and the predominant circulating variant<sup>14</sup> (i.e., to be more variant-specific): i)  
130 the 2<sup>nd</sup> wave (predominantly the ancestral and Iota variants), from August 31, 2020 (i.e., the  
131 first day of wastewater surveillance) through June 26, 2021; ii) the Delta wave (predominantly  
132 the Delta variant), from June 27, 2021 (i.e., the first week the share of Delta exceeding 50%  
133 among the sequenced specimens) through December 4, 2021; and iii) the Omicron period  
134 (predominantly Omicron subvariants and included multiple Omicron-subvariant waves), from  
135 December 5, 2021 (i.e., the first week the share of Omicron BA.1 exceeding 25% among the  
136 sequenced samples; note that we used a lower threshold here given the milder severity of  
137 Omicron BA.1<sup>15</sup> and thus likely fewer infections detected and sequenced) through August 29,  
138 2023 (i.e., the last wastewater sample during the study period).

139  
140 SARS-CoV-2 viral load in wastewater represents the pooled fecal shedding of the virus by the  
141 population, whereas the infection prevalence represents the proportion of population actively  
142 infectious at a given time (i.e., the source of the viral shedding after a potential time-lag). Thus,  
143 to estimate the viral shedding rate for each variant (per the time period defined above), we  
144 used a linear regression model, accounting for circulating variants and spatial variations by  
145 sewershed, per Eq. 1:

146  
147 
$$VL_{t \in \{t\} + \tau} = \beta_0 + \beta_1 \text{Sewershed} + \beta_2 I_t + \beta_3 \text{Period}_t + \beta_4 I_t \text{Period}_t \quad (\text{Eq. 1})$$

148  
149 where,  $VL_{t \in \{t\} + \tau}$  is the wastewater SARS-CoV-2 viral load measured during time-window  $\{t\}$ ,  
150 adjusted by a time-lag or lead of  $\tau$  days (see details below); *Sewershed* is a categorical variable  
151 (*Sewershed* = one of the 14 sewersheds in the city) to account for spatial variation;  $I_t$  is the  
152 infection prevalence estimated for week- $t$ ; and  $\text{Period}_t$  represents three epidemic time

153 periods as defined above, included as a proxy for circulating variants during week- $t$  ( $Period = 2^{nd}$   
154 wave, Delta wave, or Omicron period, as defined above). The interaction term  $I_t Period_t$  is  
155 included to account for potential nonadditive interaction of the two variables (here, in essence,  
156 to allow different viral shedding rates by variant). Per Eq. 1, we computed the estimates of  
157 fecal viral shedding rate for each variant using the coefficients  $\beta_2$  and  $\beta_4$ .

158

159 Given the different surveillance schedules and likely difference between fecal and respiratory  
160 viral shedding, we tested three sliding time-windows (i.e.,  $\{t\}$  in Eq. 1) for matching the  
161 wastewater measurements (twice per week, representing fecal shedding) with the infection  
162 prevalence estimates (weekly estimates, representing respiratory shedding); specifically, we  
163 averaged 2, 3, or 4 consecutive wastewater samples, corresponding to roughly a 1-, 1.5-, or 2-  
164 week window, respectively, depending on the wastewater sampling schedule and time-  
165 adjustment used. For each time-window  $\{t\}$ , to identify a proper time-adjustment ( $\tau$  in Eq. 1),  
166 we tested five settings to capture the time difference from becoming infectious via respiratory  
167 shedding to fecal shedding per the population-level surveillance data:

- 168 i) a 6- to 7-day lead, i.e., the wastewater samples included in time-window  $\{t\}$  started from  
169 the 1<sup>st</sup> sample taken *the week before* the infection prevalence estimate; note the 1<sup>st</sup>  
170 sample was taken on Sunday (corresponding to a maximum of 7-day lead) or Monday  
171 (corresponding to a maximum of 6-day lead);
- 172 ii) a 4- to 5-day lead, i.e., the wastewater samples included in time-window  $\{t\}$  started from  
173 the 2<sup>nd</sup> sample taken *the week before* the infection prevalence estimate; note the 2<sup>nd</sup>  
174 sample was taken on Tuesday (corresponding to a maximum of 5-day lead) or Wednesday  
175 (corresponding to a maximum of 4-day lead);
- 176 iii) concurrent (no time-difference,  $\tau=0$ ), i.e., the wastewater samples included in time-  
177 window  $\{t\}$  started from the 1<sup>st</sup> sample taken *the week of* the infection prevalence  
178 estimate;
- 179 iv) a 2- to 3-day lag, i.e., the wastewater samples included in time-window  $\{t\}$  started from  
180 the 2<sup>nd</sup> sample taken *the week of* the infection prevalence estimate (a Tuesday sample  
181 corresponded to a 2-day lag and a Wednesday sample corresponded to a 3-day lag); and
- 182 v) a 7- to 8-day lag, i.e., the wastewater samples included in time-window  $\{t\}$  started from  
183 the 1<sup>st</sup> sample taken *the week after* the infection prevalence estimate (a Sunday sample  
184 corresponded to a 7-day lag and a Monday sample corresponded to a 8-day lag).

185

186 In addition, we performed variant/period-specific analyses for each of the three time-periods  
187 defined above, using a similar model form as Eq. 1 but without the terms related to time-period  
188 ( $Period_t$ ). Since the Omicron period included multiple Omicron-subvariant waves, we also  
189 performed stratified analyses for the Omicron BA.1 wave (December 5, 2021, through March 4,

190 2022, i.e., the last week the share of Omicron BA.1 exceeding 50%) and for weeks from March  
191 5, 2022 onwards, separately.

192

### 193 **Identifying timings with higher-than-expected transmission**

194 Visual inspection of the wastewater data showed there were occasional spikes in SARS-CoV-2  
195 viral load, potentially due to intensified transmission. Due to the temporal dynamics and  
196 sampling noise, it is challenging to distinguish such potential instances (i.e., a true signal) based  
197 on the wastewater data alone. Thus, here we used the infection prevalence estimates, which  
198 had accounted for the main underlying transmission factors, to construct the expected SARS-  
199 CoV-2 viral load for comparison. Specifically, we first computed the daily infection prevalence  
200 using the weekly estimates with a spline smoothing function, and then used those as inputs in  
201 Eq. 1 to compute the expected daily SARS-CoV-2 viral load (median and 90% confidence  
202 intervals [CI]). Given the large variance in both the infection prevalence estimates and SARS-  
203 CoV-2 viral load data, we deemed a wastewater measurement higher than expected, if it was  
204 higher than the 95<sup>th</sup> percentile (i.e., the upper bound of the 90% CI) of the expected SARS-CoV-  
205 2 viral load.

206

207 To examine the timing with higher-than-expected SARS-CoV-2 viral load, we grouped the  
208 identified anomaly dates into 10-day bins based on calendar time, i.e., the 1<sup>st</sup> (early), 2<sup>nd</sup> (mid),  
209 and last (late) 10 days of each month; for example, January 1 of 2021, January 5 of 2022, and  
210 January 10 of 2023 would all be grouped as “early-January”. This allows recurrent and/or  
211 seasonal events to be grouped in the same or nearby bins. To test whether the identified  
212 anomalies occurred at random (e.g., due to noise in the data), we further performed a  
213 bootstrap test with 5000 random samples. For each bootstrapping set, we randomly sampled  
214  $n_{anomaly}$  (i.e., the number of identified anomalies) dates from the wastewater measurements ( $N$   
215 = 3794), and then grouped the dates into the same 10-day bins as done for the identified  
216 anomalies. We then pooled the 5000 sets together to construct the distribution of each timing.  
217 For example, for early-January (the first 10-day calendar bin), with  $n_1, n_2, \dots,$  and  $n_{5000}$  of the  
218 dates falling in that bin for the 5000 sets, the likelihood of having  $k$  ( $k= 0, \dots, n_{anomaly}$ , i.e., from  
219 none to all) anomalies during early-January would be:

$$220 P(x = k) = \frac{\text{number of } n_i=k \text{ among the 5000 bootstrapping samples}}{5000};$$

221 and the likelihood of having  $k$  or more anomalies during early-January would be:

$$222 P(x \geq k) = \frac{\text{number of } n_i \geq k \text{ among the 5000 bootstrapping samples}}{5000}.$$

223

### 224 **Sensitivity Analyses**

225 In a first sensitivity analysis, we only included SARS-CoV-2 viral load measured by RT-qPCR (i.e.,  
226 August 31, 2020– April 11, 2023), to examine if the viral shedding rate estimates were affected

227 by converting RT-dPCR measurements to RT-qPCR equivalents due to changes in testing assays.  
228 In a second sensitivity analysis, we included all SARS-CoV-2 viral load measurements but used  
229 the sewershed-specific conversion ratios instead of the citywide conversion ratio for all  
230 sewersheds.

231

## 232 **RESULTS**

### 233 **General trends in measured wastewater SARS-CoV-2 viral load and estimated infection** 234 **prevalence.**

235 During the 3-year study period (August 31, 2020 – August 29, 2023), trends in wastewater  
236 SARS-CoV-2 viral load were generally consistent with the trends in estimated infection  
237 prevalence (Fig 1). Across the 14 NYC sewersheds (Fig 1A), wastewater SARS-CoV-2 viral load  
238 tended to rise and fall around the same time (Fig 1B-D and Figs S1-3), indicating epidemic  
239 waves were highly synchronized across the city. However, the magnitudes of wastewater SARS-  
240 CoV-2 viral load and infection prevalence estimates both varied substantially over time and  
241 across sewersheds and may not scale consistently. For example, even though certain  
242 sewersheds tended to detect higher SARS-CoV-2 viral loads than others, the rankings changed  
243 across different waves (see Fig S1-3, ranked by average viral load). Similar spatial heterogeneity  
244 was apparent in the estimated infection prevalence and the discrepancies between wastewater  
245 SARS-CoV-2 viral load and estimated infection prevalence appeared larger during the 2<sup>nd</sup> wave  
246 (Fig S1). Such spatial heterogeneity is not unexpected, since several factors such as RNA  
247 degradation<sup>16</sup> and dilution,<sup>16</sup> and the contribution of infected animals<sup>17</sup> could all vary by  
248 sewershed, and ultimately affect wastewater measurements. In addition, uncertainty in the  
249 infection prevalence estimate could also vary by sewershed (e.g., larger uncertainty for those  
250 with smaller population size; see, e.g., the wider uncertainty bounds for Oakwood Beach  
251 sewershed in Fig S1).

252

### 253 **Estimated fecal viral shedding patterns.**

254 Using the wastewater SARS-CoV-2 viral load data and infection prevalence estimates (i.e.,  
255 source of fecal viral shedding), we examined fecal viral shedding patterns over the entire study  
256 period or stratified by variant/time-period, separately. The estimates are generally consistent  
257 (Table 1). Among the 15 combinations of fecal viral shedding time-differences and durations  
258 tested, the main model (including all waves) identified concurrent infection prevalence  
259 estimates (i.e., no time-difference between becoming infectious via respiratory shedding and  
260 fecal shedding) and SARS-CoV-2 viral load aggregated over 3 wastewater samples (2 during the  
261 same week and 1 in the beginning of the following week, i.e., a 8- to 9- day-time-interval) as the  
262 best setting (highest adjusted R-squared; Fig 2A). Using a 4-5-day-lead and aggregation over 4  
263 wastewater samples (i.e., one sample 4-5 days before, two during, and one 1-2 days after the  
264 infection prevalence estimate) led to the second-best model fit (Fig 2A, 2<sup>nd</sup> dark bar), and was

265 the best setting for the Delta wave and weeks after the BA.1 wave in the stratified analysis  
266 (Table 1). Model fit degraded quickly with changing time-differences (both leads and lags),  
267 when only 2 (roughly a 1-week duration) or 3 (roughly a 1.5-week duration) wastewater  
268 samples were included.

269  
270 Estimated fecal viral shedding rate was highest for infections during the 2<sup>nd</sup> wave (mostly due  
271 to the ancestral and Iota variants), at 1.44 (95% CI: 1.35 – 1.53) billion RNA copies by RT-qPCR in  
272 wastewater per day per infectious person [or 24 (95% CI: 22.49 - 25.51) billion RNA copies per  
273 RT-dPCR conversion; see Methods]. The estimated rate decreased by ~20% during the  
274 subsequent Delta wave and by 50-60% during the Omicron period (Table 1). Importantly, we  
275 note the lower estimates for Delta and Omicron may in part reflect reduced shedding among  
276 vaccinees and recoverees, in addition to variant-specific variations.

277

### 278 **Timings with higher-than-expected transmission**

279 The infection prevalence estimates have accounted for the general transmission factors (here,  
280 population-level mobility, vaccinations, variant-specific properties, and seasonal risk of  
281 infection; see Methods), but may have not fully accounted for activities such as increased  
282 gatherings during certain time-periods that might increase transmission. In contrast,  
283 wastewater SARS-CoV-2 viral load is a composite measure of all transmission events. Thus,  
284 comparison of these two quantities could support identification of such events. Following a  
285 procedure designed per this mechanism (see Methods), we identified 198 occasions where  
286 wastewater SARS-CoV-2 viral loads exceeded the expected levels in any of the 14 sewersheds  
287 (see Fig 3A for identified anomalies for Newtown Creek, the sewershed with the largest service  
288 population). These anomalies disproportionately occurred during late January, late April - early  
289 May, early August, and mid-November to late-December (Fig 3B), with frequencies exceeding  
290 the expectation assuming random occurrence. Among the 5000 bootstrapping sets, none had  
291 as many or more anomalies as observed in early August or late November ( $P = 0$ ) and less than  
292 5% had as many or more anomalies as observed in late January, late April, early May, late  
293 November, and late December ( $P < 0.05$  for all these calendar bins; Table S2).

294

### 295 **Sensitivity analyses**

296 Results from the two sensitivity analyses are consistent with the main analysis. In the 1<sup>st</sup>  
297 sensitivity analysis (i.e., using SARS-CoV-2 viral load measured by RT-qPCR alone, for a shorter  
298 study period from 8/31/20 to 4/11/23), similar fecal viral shedding rates were estimated (Table  
299 S3). The 2<sup>nd</sup> sensitivity analysis (using sewershed-specific conversion ratios to convert the RT-  
300 dPCR measurements after 4/11/23, same study period as the main analysis) estimated the  
301 same fecal viral shedding rates as the main analysis, and identified three additional anomalies  
302 (i.e., 1 in late-January, 1 in mid-August, and 1 in early-July).



303

304 **DISCUSSION**

305 Wastewater surveillance can be a valuable tool for monitoring SARS-CoV-2 circulation in the  
306 population. To further develop understanding of wastewater surveillance data, we have  
307 combined independent model-inference estimates of infection prevalence to characterize fecal  
308 viral shedding patterns for multiple major SARS-CoV-2 variants. Using NYC as an example, we  
309 have also demonstrated that these data and estimates can support the identification of time  
310 periods with potentially intensified transmission.

311

312 Importantly, here we examined how wastewater SARS-CoV-2 viral shedding is related to  
313 estimated infection prevalence, rather than health outcomes as in previous studies. This choice  
314 could lead to certain apparent differences but has several advantages. First, previous studies  
315 have reported detection of SARS-CoV-2 in wastewater (e.g., an increase in viral load, or the  
316 presence of a new variant) several days ahead of the detection of cases, hospitalizations, or  
317 deaths, due to the delay in health outcomes.<sup>18-20</sup> Here, infection prevalence is a proxy of  
318 respiratory tract shedding, which could precede fecal viral shedding. Indeed, we found  
319 wastewater SARS-CoV-2 viral loads measured round 1.5 week of the infection prevalence  
320 estimate afforded the best model fit (Table 1). This finding suggests that fecal viral shedding  
321 likely starts around the same time an individual becomes infectious and lasts slightly longer  
322 than the shedding from respiratory tract. Consistent with our finding, studies have shown that  
323 fecal SARS-CoV-2 RNA was detectable in patients within the first week of COVID-19 diagnosis  
324 and could last longer than respiratory shedding.<sup>16,21</sup>

325

326 Second, case-, hospitalization-, or death-to-wastewater-viral-load ratio could decrease with  
327 increased vaccinations/reinfections and circulation of milder variants (e.g., Omicron) due to  
328 reduced severity or testing, and such reductions have been reported.<sup>19,22</sup> In contrast, as our  
329 estimates included all infections regardless of severity or testing, the infection-to-wastewater-  
330 viral-load ratio (roughly, the inverse of estimated per-infection fecal viral shedding rate; Table  
331 1) is relatively stable during each variant wave. For example, the wave-stratified analysis  
332 estimated similar fecal viral shedding rates for the BA.1 wave and weeks after BA.1 (Table 1).  
333 Importantly, using the infection prevalence estimates, we are able to quantify the fecal viral  
334 shedding rate for each major SARS-CoV-2 variant/time-period (Table 1). These estimates can be  
335 used to account for changes in underlying infection rate during this study period (e.g.  
336 converting wastewater SARS-CoV-2 viral loads to infection prevalence per Table 1) and help  
337 examine changes in COVID-19 severity (e.g., changes in hospitalization rate and infection-  
338 fatality risk). Such wastewater-viral-load and infection-based estimates may be more accurate  
339 than case-based measures, which are subject to test-seeking biases.

340

341 Third, previous studies have measured viral loads in clinical samples from the respiratory tract.  
342 Based on the reported cycle threshold (CT) values, the respiratory tract viral load was higher in  
343 Delta and Omicron infections than the ancestral variant,<sup>23-28</sup> consistent with the higher  
344 infectiousness of these variants of concern. In contrast, fecal viral shedding is not a main mode  
345 of transmission,<sup>29,30</sup> and here using variant circulation time-period as a proxy, we estimate that  
346 the fecal viral shedding rate was the highest for the ancestral/Iota variants, followed by Delta  
347 (~20% lower), and then Omicron (~50-60% lower; Table 1). Early studies of ancestral SARS-CoV-  
348 2 infections found that patients with diarrhea shed more viruses than patients without diarrhea  
349 (see, e.g., a review in ref. <sup>16</sup>), suggesting fecal viral shedding may be associated with diarrhea. In  
350 addition, studies found that vaccinations reduced the number of diarrhea episodes,<sup>31</sup> and that  
351 rates of diarrhea were highest among patients infected with the ancestral SARS-CoV-2, followed  
352 by patients infected with Delta and then Omicron.<sup>32,33</sup> Our estimates are consistent with the  
353 fecal viral shedding studies,<sup>16,31-33</sup> and support a difference in viral load between SARS-CoV-2  
354 fecal shedding and respiratory tract shedding, in addition to the timing difference noted above.

355  
356 In addition to characterizing SARS-CoV-2 fecal viral shedding pattern, we are also able to  
357 identify certain time-periods with intensified transmission. In NYC, analysis based on calendar  
358 timing showed likely intensified transmission during late-November through December (Fig 3B).  
359 Increased transmission also occurred during early August and late January. It is possible that  
360 other factors such as travel, holidays, or specific COVID-19 sub-variants could help explain these  
361 periods of intensified transmission, but further investigation is needed to determine their  
362 impact.

363  
364 Lastly, we note several limitations. First, given the biweekly sampling dates for wastewater and  
365 weekly estimates for infection prevalence, we were unable to test finer time-differences and  
366 durations when examining SARS-CoV-2 fecal shedding pattern. Second, the estimates here were  
367 based on population data and thus represent an average of all individuals undergoing different  
368 disease stages in the population. As such, the estimated fecal shedding duration may be shorter  
369 than that reported in studies based on individual patient data (e.g., days or weeks after  
370 respiratory tract samples became negative<sup>16</sup>). Third, our infection prevalence estimates have  
371 accounted for the main transmission factors, through the information encapsulated in the  
372 COVID-19 case, ED visit, and mortality data used for model estimation. Thus, the expected  
373 SARS-CoV-2 viral load constructed using these estimates and in turn the identified anomalies  
374 are both conservative estimates and may have missed additional anomalies. In addition,  
375 wastewater collected from sewersheds may represent individuals who are residents of NYC as  
376 well as outside NYC, while infection prevalence estimates are based on NYC residents only.

377

378 In summary, we have characterized the fecal viral shedding pattern of SARS-CoV-2 in  
379 wastewater in New York City from 2020-2023. These estimates can be used to account for  
380 changes in underlying infection rate and help more accurately quantify changes in COVID-19  
381 transmission and severity over time. We have also demonstrated that wastewater surveillance  
382 data combined with model-inference estimates can support the identification of time-periods  
383 that potentially intensify transmission. Additional studies are needed to better understand  
384 these periods and the potential to mitigate SARS-Cov-2 transmission.

385

#### 386 **Acknowledgements:**

387 This study was supported by the National Institute of Allergy and Infectious Diseases (AI175747)  
388 and Centers for Disease Control and Prevention (CDC) and the Council of State and Territorial  
389 Epidemiologists (CSTE; contract no.: NU38OT00297). The authors thank Lauren Firestein for  
390 overseeing the data use agreement and facilitating data sharing for this project; Ramona Lall for  
391 providing syndromic surveillance emergency department data; Wenhui Li for providing COVID-  
392 19-associated mortality data; Iris Cheng for providing immunization data; Jubayer Ahmed,  
393 Nelson De La Cruz, and Brandon Nguyen for managing and providing wastewater data; the NYC  
394 DOHMH Respiratory Pathogens data team for overarching data management and provision of  
395 data for this project; and Shama Ahuja, Sharon Greene, Scott Harper, Elizabeth Luoma, Ulrike  
396 Siemetzki-Kapoor, Celia Quinn, and Faten Taki for their input on this manuscript.

397

398 **Author contributions:** WY designed the study, performed the analysis, and wrote the first draft;  
399 EO, AO, and EAW oversaw provision of the SARS-CoV-2 wastewater surveillance data; HP and EL  
400 oversaw provision of the COVID-19 case and emergency department visit data. All authors  
401 contributed to the final draft.

402

#### 403 **Conflict of interest:**

404 The authors declare that they have no conflict of interest.

405

#### 406 **References:**

- 407 1. Reynolds LJ, Gonzalez G, Sala-Comorera L, et al. SARS-CoV-2 variant trends in Ireland:  
408 Wastewater-based epidemiology and clinical surveillance. *Sci Total Environ*. Sep 10  
409 2022;838(Pt 2):155828. doi:10.1016/j.scitotenv.2022.155828
- 410 2. Hoar C, Chauvin F, Clare A, et al. Monitoring SARS-CoV-2 in wastewater during New York  
411 City's second wave of COVID-19: sewershed-level trends and relationships to publicly  
412 available clinical testing data. *Environ Sci-Wat Res*. Mar 16 2022;doi:10.1039/d1ew00747e
- 413 3. Melvin RG, Chaudhry N, Georgewill O, Freese R, Simmons GE. Predictive power of SARS-  
414 CoV-2 wastewater surveillance for diverse populations across a large geographical range.  
415 *medRxiv*. Jan 30 2021;doi:10.1101/2021.01.23.21250376

- 416 4. Sanjuán R, Domingo-Calap P. Reliability of Wastewater Analysis for Monitoring COVID-19  
417 Incidence Revealed by a Long-Term Follow-Up Study. Original Research. *Frontiers in*  
418 *Virology*. 2021-November-19 2021;1doi:10.3389/fviro.2021.776998
- 419 5. Schmitz BW, Innes GK, Prasek SM, et al. Enumerating asymptomatic COVID-19 cases and  
420 estimating SARS-CoV-2 fecal shedding rates via wastewater-based epidemiology. *Sci Total*  
421 *Environ*. Dec 20 2021;801:149794. doi:10.1016/j.scitotenv.2021.149794
- 422 6. Ungar L. Pandemic gets tougher to track as COVID testing plunges. Updated 5/10/2022.  
423 Accessed 8/16/2023, [https://apnews.com/article/covid-us-testing-decline-](https://apnews.com/article/covid-us-testing-decline-14bf5b0901260b063e4fa444633f4d31)  
424 [14bf5b0901260b063e4fa444633f4d31](https://apnews.com/article/covid-us-testing-decline-14bf5b0901260b063e4fa444633f4d31)
- 425 7. Arielle Mitropoulos, Brownstein J. Decline of testing, sequencing could hinder search for  
426 future COVID-19 variants, experts warn. 1/9/2024, Updated 3/30/2022. Accessed  
427 1/9/2024, 2024. [https://abcnews.go.com/Health/decline-testing-sequencing-hinder-](https://abcnews.go.com/Health/decline-testing-sequencing-hinder-search-future-covid-19/story?id=83727646)  
428 [search-future-covid-19/story?id=83727646](https://abcnews.go.com/Health/decline-testing-sequencing-hinder-search-future-covid-19/story?id=83727646)
- 429 8. Keshaviah A, R.N. , Karmali DV, T. Huffman, X.C. Hu, Diamond MB. *The Role of Wastewater*  
430 *Data in Pandemic Management*. 2022.
- 431 9. Yang W, Kandula S, Huynh M, et al. Estimating the infection-fatality risk of SARS-CoV-2 in  
432 New York City during the spring 2020 pandemic wave: a model-based analysis. *The Lancet*  
433 *Infectious Diseases*. 2021;21(2):203-212. doi:10.1016/S1473-3099(20)30769-6
- 434 10. Yang W, Greene SK, Peterson ER, et al. Epidemiological characteristics of the B.1.526 SARS-  
435 CoV-2 variant. *Science Advances*. 2022;8(4):eabm0300. doi:doi:10.1126/sciadv.abm0300
- 436 11. Ahmed W, Smith WJM, Metcalfe S, et al. Comparison of RT-qPCR and RT-dPCR Platforms  
437 for the Trace Detection of SARS-CoV-2 RNA in Wastewater. *ACS ES&T Water*. 2022/11/11  
438 2022;2(11):1871-1880. doi:10.1021/acsestwater.1c00387
- 439 12. Yang W, Parton H, Li W, Watts EA, Lee E, Yuan H. SARS-CoV-2 dynamics in New York City  
440 during March 2020 - August 2023. *medRxiv*. 2024:2024.07.19.24310728.  
441 doi:10.1101/2024.07.19.24310728
- 442 13. New York City Department of Health and Mental Hygiene. NYC UHF 42 Neighborhoods.  
443 <http://a816-dohbesp.nyc.gov/IndicatorPublic/EPHTPDF/uhf42.pdf>
- 444 14. New York City Department of Health and Mental Hygiene. Variants.  
445 <https://github.com/nychealth/coronavirus-data/tree/master/variants>
- 446 15. Wolter N, Jassat W, Walaza S, et al. Early assessment of the clinical severity of the SARS-  
447 CoV-2 omicron variant in South Africa: a data linkage study. *The Lancet*.  
448 2022;399(10323):437-446. doi:10.1016/S0140-6736(22)00017-4
- 449 16. Foladori P, Cutrupi F, Segata N, et al. SARS-CoV-2 from faeces to wastewater treatment:  
450 What do we know? A review. *Sci Total Environ*. Nov 15 2020;743:140444.  
451 doi:10.1016/j.scitotenv.2020.140444
- 452 17. Meekins DA, Gaudreault NN, Richt JA. Natural and Experimental SARS-CoV-2 Infection in  
453 Domestic and Wild Animals. *Viruses*. Oct 4 2021;13(10)doi:10.3390/v13101993
- 454 18. Karthikeyan S, Levy JI, De Hoff P, et al. Wastewater sequencing reveals early cryptic SARS-  
455 CoV-2 variant transmission. *Nature*. Sep 2022;609(7925):101-108. doi:10.1038/s41586-  
456 022-05049-6
- 457 19. Hegazy N, Cowan A, D'Aoust PM, et al. Understanding the dynamic relation between  
458 wastewater SARS-CoV-2 signal and clinical metrics throughout the pandemic. *Science of the*  
459 *Total Environment*. Dec 20 2022;853doi:10.1016/j.scitotenv.2022.158458

- 460 20. Hopkins L, Persse D, Caton K, et al. Citywide wastewater SARS-CoV-2 levels strongly  
461 correlated with multiple disease surveillance indicators and outcomes over three COVID-19  
462 waves. *Sci Total Environ*. Jan 10 2023;855:158967. doi:10.1016/j.scitotenv.2022.158967
- 463 21. Natarajan A, Zlitni S, Brooks EF, et al. Gastrointestinal symptoms and fecal shedding of  
464 SARS-CoV-2 RNA suggest prolonged gastrointestinal infection. *Med*. 2022;3(6):371-387. e9.
- 465 22. Nourbakhsh S, Fazil A, Li M, et al. A wastewater-based epidemic model for SARS-CoV-2  
466 with application to three Canadian cities. *Epidemics-Neth*. Jun  
467 2022;39doi:10.1016/j.epidem.2022.100560
- 468 23. Teyssou E, Delagreverie H, Visseaux B, et al. The Delta SARS-CoV-2 variant has a higher viral  
469 load than the Beta and the historical variants in nasopharyngeal samples from newly  
470 diagnosed COVID-19 patients. *J Infection*. Oct 2021;83(4):E1-E3.  
471 doi:10.1016/j.jinf.2021.08.027
- 472 24. Li B, Deng A, Li K, et al. Viral infection and transmission in a large, well-traced outbreak  
473 caused by the SARS-CoV-2 Delta variant. *medRxiv*. 2021:2021.07.07.21260122.  
474 doi:10.1101/2021.07.07.21260122
- 475 25. Yang Y, Guo L, Yuan J, et al. Viral and antibody dynamics of acute infection with SARS-CoV-  
476 2 omicron variant (B.1.1.529): a prospective cohort study from Shenzhen, China. *Lancet*  
477 *Microbe*. Aug 2023;4(8):e632-e641. doi:10.1016/S2666-5247(23)00139-8
- 478 26. Woodbridge Y, Amit S, Huppert A, Kopelman NM. Viral load dynamics of SARS-CoV-2 Delta  
479 and Omicron variants following multiple vaccine doses and previous infection. *Nat*  
480 *Commun*. Nov 7 2022;13(1):6706. doi:10.1038/s41467-022-33096-0
- 481 27. Miguères M, Dimeglio C, Mansuy JM, et al. Influence of Nasopharyngeal Viral Load on the  
482 Spread of the Omicron BA.2 Variant. *Clin Infect Dis*. Feb 8 2023;76(3):e514-e517.  
483 doi:10.1093/cid/ciac563
- 484 28. Imai K, Ikeno R, Tanaka H, Takada N. SARS-CoV-2 Omicron Variant in Human Saliva Samples  
485 in Cell-Free Form. *JAMA Netw Open*. Jan 3 2023;6(1):e2250207.  
486 doi:10.1001/jamanetworkopen.2022.50207
- 487 29. Wolfel R, Corman VM, Guggemos W, et al. Virological assessment of hospitalized patients  
488 with COVID-2019. *Nature*. May 2020;581(7809):465-469. doi:10.1038/s41586-020-2196-x
- 489 30. Albert S, Ruiz A, Peman J, Salavert M, Domingo-Calap P. Lack of evidence for infectious  
490 SARS-CoV-2 in feces and sewage. *Eur J Clin Microbiol Infect Dis*. Dec 2021;40(12):2665-  
491 2667. doi:10.1007/s10096-021-04304-4
- 492 31. Boulware DR, Murray TA, Proper JL, et al. Impact of Severe Acute Respiratory Syndrome  
493 Coronavirus 2 (SARS-CoV-2) Vaccination and Booster on Coronavirus Disease 2019 (COVID-  
494 19) Symptom Severity Over Time in the COVID-OUT Trial. *Clinical Infectious Diseases*.  
495 2022;76(3):e1-e9. doi:10.1093/cid/ciac772
- 496 32. Pena Rodriguez M, Hernandez Bello J, Vega Magana N, et al. Prevalence of symptoms,  
497 comorbidities, and reinfections in individuals infected with Wild-Type SARS-CoV-2, Delta,  
498 or Omicron variants: a comparative study in western Mexico. *Front Public Health*.  
499 2023;11:1149795. doi:10.3389/fpubh.2023.1149795
- 500 33. Torabi SH, Riahi SM, Ebrahimzadeh A, Salmani F. Changes in symptoms and characteristics  
501 of COVID-19 patients across different variants: two years study using neural network  
502 analysis. *BMC Infect Dis*. Nov 28 2023;23(1):838. doi:10.1186/s12879-023-08813-9
- 503

**Table 1.** Estimated patterns of SARS-CoV-2 fecal viral shedding in wastewater. Note in this study, SARS-CoV-2 RNA concentration was measured using quantitative reverse transcription polymerase chain reaction (RT-qPCR) assays during August 31, 2020, through April 11, 2023, and reverse transcription digital PCR (RT-dPCR) assays from November 1, 2022, through August 29, 2023. Based on samples tested using both assays, the RT-qPCR and RT-dPCR measures differed by a factor of 16.7. We used this conversion factor to convert measures from the two methods and provide estimates for RT-qPCR and RT-dPCR assays, separately.

| model                     | wave                               | shedding rate (billion copies per day per infectious person, mean and 95% Confidence interval) | lag (days) | number of samples | adjusted R <sup>2</sup> |
|---------------------------|------------------------------------|------------------------------------------------------------------------------------------------|------------|-------------------|-------------------------|
| Include all variant waves | 2nd wave (08/31/20-06/26/21)       | 1.44 (1.35, 1.53) per qPCR;<br>24.0 (22.49, 25.51) per dPCR <sup>a</sup>                       | 0          | 3                 | 0.84                    |
|                           | Delta wave (06/27/21-12/04/21)     | 1.13 (0.86, 1.4) per qPCR;<br>18.9 (14.45, 23.35) per dPCR <sup>a</sup>                        | 0          | 3                 | 0.84                    |
|                           | Omicron period (12/05/21-08/29/23) | 0.6 (0.59, 0.61) per qPCR;<br>9.96 (9.76, 10.16) per dPCR <sup>b</sup>                         | 0          | 3                 | 0.84                    |
| Stratified by wave/period | 2nd wave (08/31/20-06/26/21)       | 1.44 (1.37, 1.52) per qPCR;<br>24.07 (22.85, 25.28) per dPCR <sup>a</sup>                      | 0          | 4                 | 0.74                    |
|                           | Delta wave (06/27/21-12/04/21)     | 1.09 (0.91, 1.27) per qPCR;<br>18.14 (15.21, 21.08) per dPCR <sup>a</sup>                      | -5         | 4                 | 0.37                    |
|                           | Omicron period (12/05/21-08/29/23) | 0.6 (0.59, 0.61) per qPCR;<br>9.98 (9.76, 10.2) per dPCR <sup>b</sup>                          | 0          | 3                 | 0.86                    |
|                           | Omicron BA.1 (12/05/21-03/05/22)   | 0.59 (0.56, 0.61) per qPCR;<br>9.78 (9.32, 10.23) per dPCR <sup>a</sup>                        | 0          | 3                 | 0.91                    |
|                           | After BA.1 (03/06/22-08/29/23)     | 0.72 (0.7, 0.75) per qPCR;<br>12.11 (11.72, 12.5) per dPCR <sup>b</sup>                        | -5         | 4                 | 0.78                    |

<sup>a</sup>RT-qPCR assays were used to measure SARS-CoV-2 RNA concentration during this period; the dPCR estimates were made by conversion (see Methods);

<sup>b</sup>RT-qPCR assays were used to measure SARS-CoV-2 RNA concentration through April 11, 2023 and RT-dPCR assays were used afterwards; conversion was used to obtain estimates for the entire period (see Methods).

## Figures

**Fig 1.** Trends in wastewater SARS-CoV-2 viral load in the 14 sewersheds in NYC. The map in (A) shows 14 sewersheds (delineated by color) and 42 United Hospital Fund neighborhoods (delineated by lines). Dots show the per-capita SARS-CoV-2 viral load in each of the 14 sewersheds (right y-axis, in million copies per day per population by RT-qPCR; color coded per the legend) during the 2<sup>nd</sup> wave (B), Delta wave (C), and Omicron period (D). For comparison, we overlay the citywide estimates of infection prevalence (left y-axis; blue line = median; darker blue area = 50% CI and lighter blue area = 95% CI).

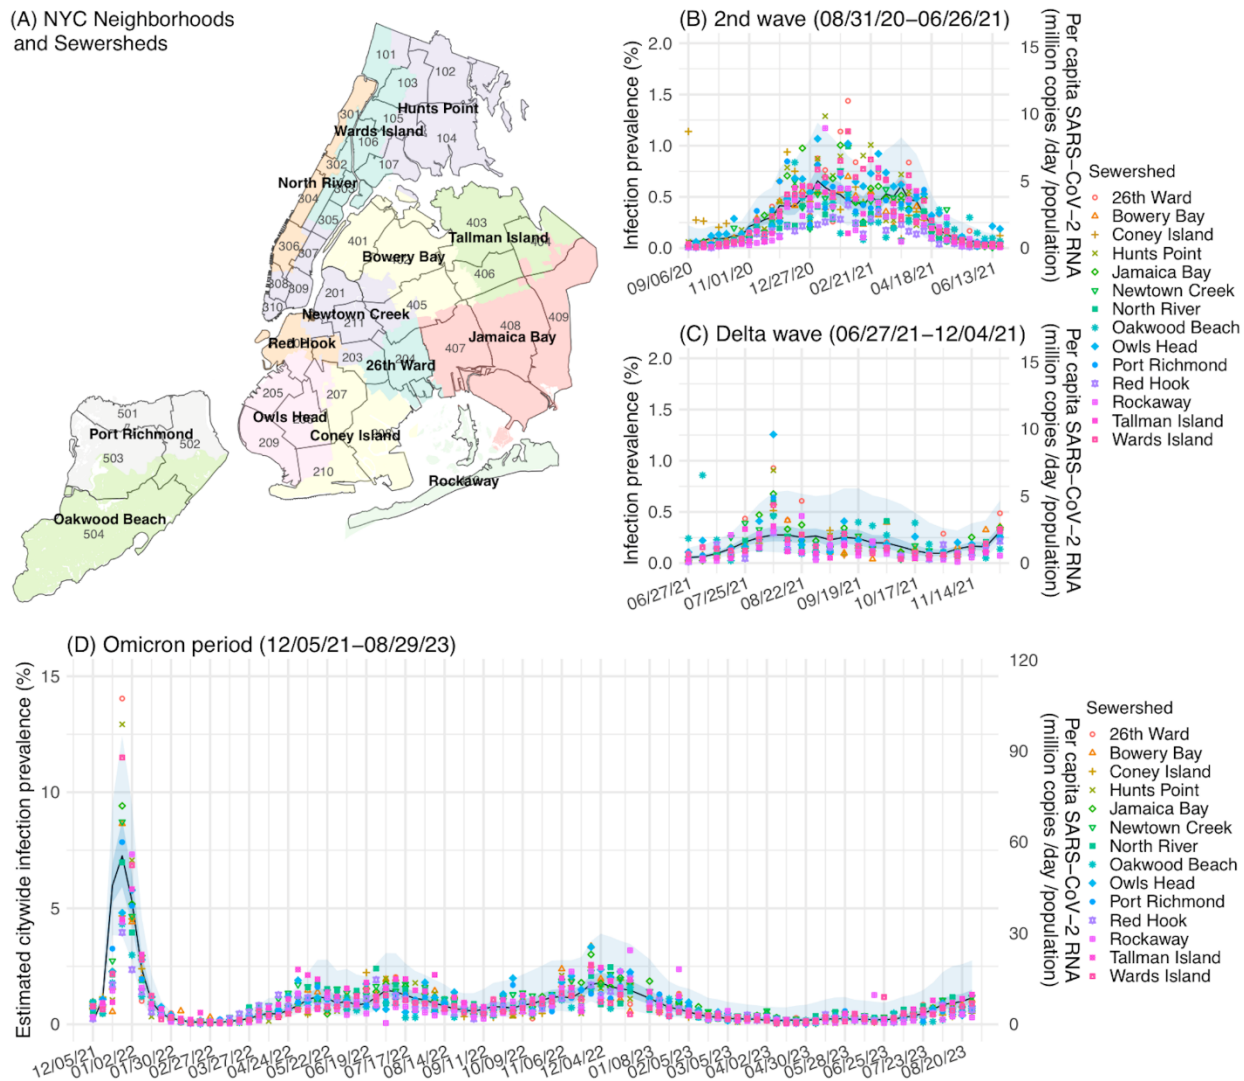

**Fig 2. Model fit.** (A) shows model performance based on the adjusted R-squared (higher number represents better performance) for different settings of time from becoming infectious to fecal viral shedding and time window of the wastewater samples are aggregated. The asterisk indicates the setting with the highest adjusted R-squared (i.e., best-fit model). (B) shows the model fit compared to the data.

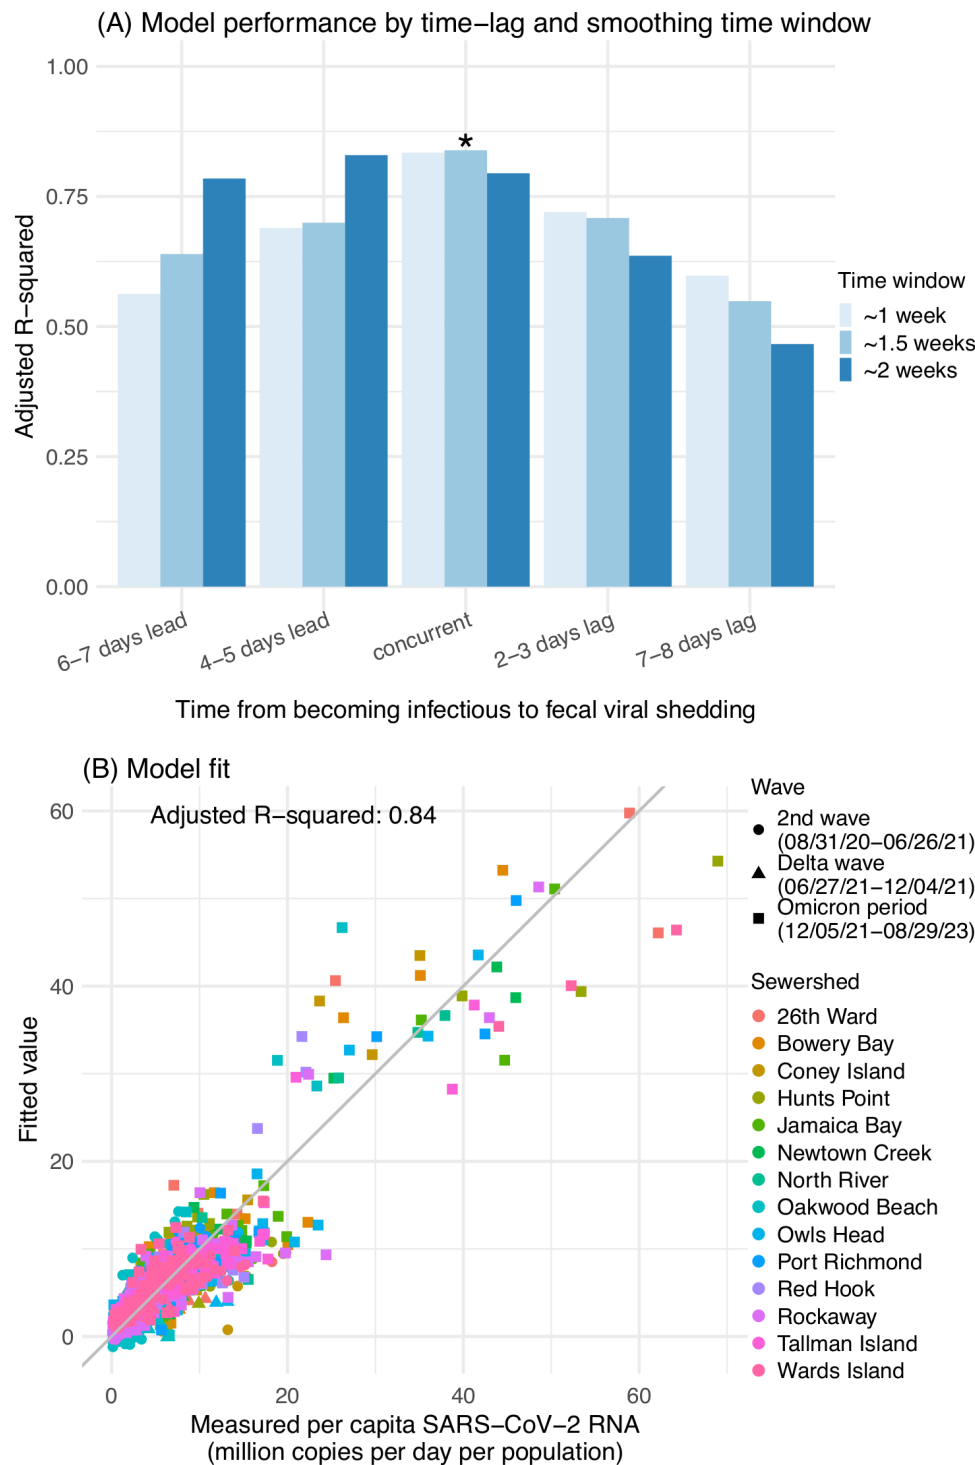



**Fig 3.** Identified time-periods with intensified transmission in any of 14 NYC sewersheds. (A) shows an example of the measured (dots) and expected wastewater SARS-CoV-2 viral load (blue line = median; darker blue area = 50% CI and lighter blue area = 95% CI), and identified anomalies with SARS-CoV-2 viral load exceeding the expected (red labels). (B) shows the distribution of all identified anomalies. Asterisks indicate time-periods that exceeded the expected wastewater SARS-CoV-2 viral load with a frequency higher than chance assuming random occurrence per a bootstrapping test (\* for  $P < 0.1$  and \*\* for  $P < 0.05$ ). Spatial distribution of the anomalies is shown in Fig S4.

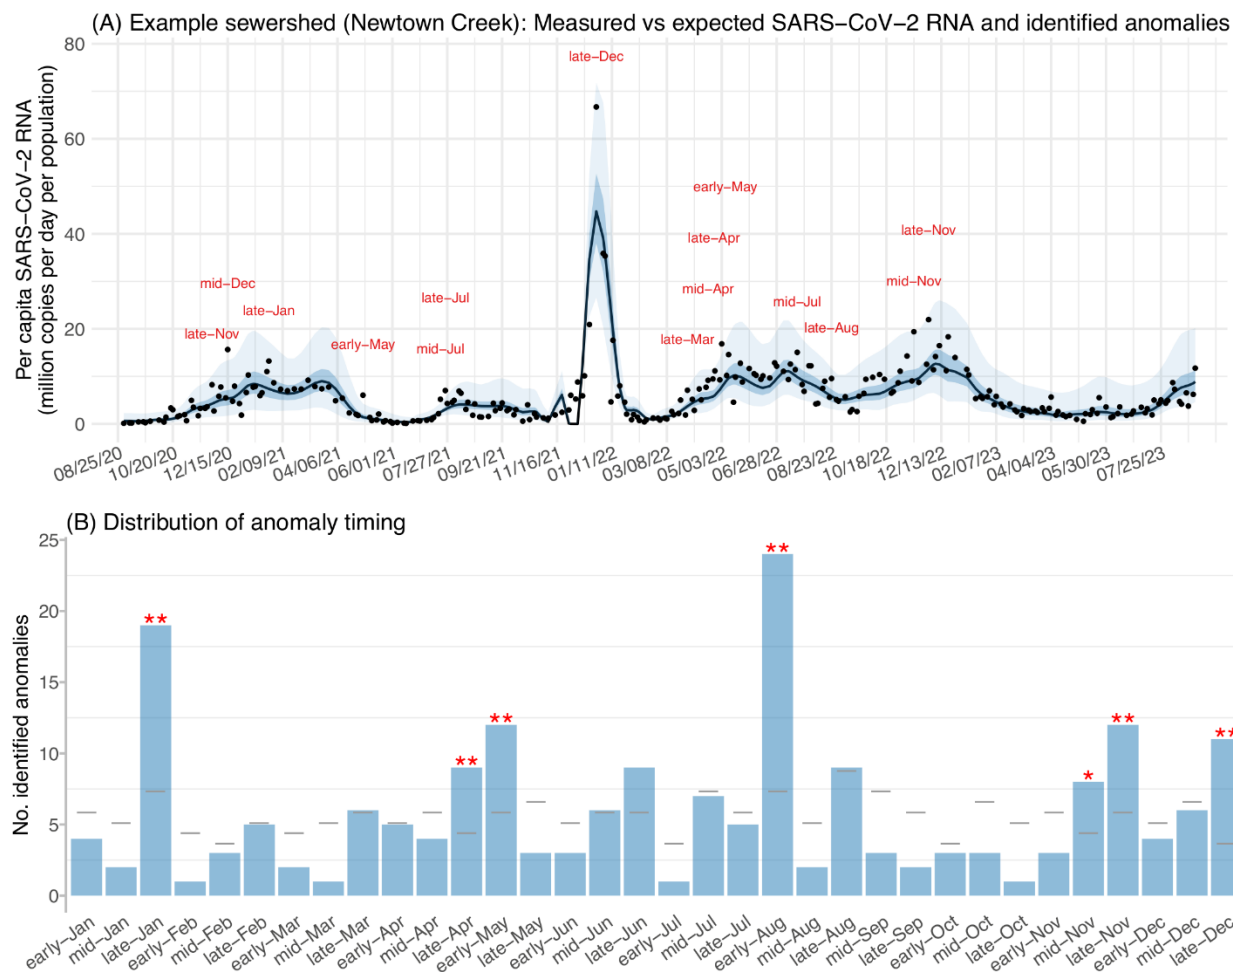

## Supplement Tables and Figures

**Table S1.** Summary statistics for the wastewater samples

| <b>statistics</b>    | <b>value</b> | <b>n</b> | <b>percentage</b> |
|----------------------|--------------|----------|-------------------|
| Total No. of samples | -            | 3794     | 100%              |
| Day of sampling      | Sunday       | 1834     | 48.3%             |
| Day of sampling      | Tuesday      | 1736     | 45.8%             |
| Day of sampling      | Wednesday    | 126      | 3.3%              |
| Day of sampling      | Monday       | 98       | 2.6%              |
| Sampling frequency   | 2 per week   | 1610     | 73.7%             |
| Sampling frequency   | 1 per week   | 574      | 26.3%             |
| Calendar time        | late-Aug     | 168      | 4.4%              |
| Calendar time        | early-Aug    | 140      | 3.7%              |
| Calendar time        | late-Jan     | 140      | 3.7%              |
| Calendar time        | mid-Jul      | 140      | 3.7%              |
| Calendar time        | mid-Sep      | 140      | 3.7%              |
| Calendar time        | late-May     | 126      | 3.3%              |
| Calendar time        | mid-Dec      | 126      | 3.3%              |
| Calendar time        | mid-Oct      | 126      | 3.3%              |
| Calendar time        | early-Jan    | 112      | 3%                |
| Calendar time        | early-May    | 112      | 3%                |
| Calendar time        | early-Nov    | 112      | 3%                |
| Calendar time        | late-Jul     | 112      | 3%                |
| Calendar time        | late-Jun     | 112      | 3%                |
| Calendar time        | late-Mar     | 112      | 3%                |
| Calendar time        | late-Nov     | 112      | 3%                |
| Calendar time        | late-Sep     | 112      | 3%                |
| Calendar time        | mid-Apr      | 112      | 3%                |
| Calendar time        | mid-Jun      | 112      | 3%                |
| Calendar time        | early-Apr    | 98       | 2.6%              |
| Calendar time        | early-Dec    | 98       | 2.6%              |
| Calendar time        | early-Jun    | 98       | 2.6%              |
| Calendar time        | late-Feb     | 98       | 2.6%              |
| Calendar time        | late-Oct     | 98       | 2.6%              |
| Calendar time        | mid-Aug      | 98       | 2.6%              |
| Calendar time        | mid-Jan      | 98       | 2.6%              |
| Calendar time        | mid-Mar      | 98       | 2.6%              |
| Calendar time        | mid-May      | 98       | 2.6%              |
| Calendar time        | early-Feb    | 84       | 2.2%              |
| Calendar time        | early-Mar    | 84       | 2.2%              |
| Calendar time        | late-Apr     | 84       | 2.2%              |
| Calendar time        | mid-Nov      | 84       | 2.2%              |
| Calendar time        | early-Jul    | 70       | 1.8%              |
| Calendar time        | early-Oct    | 70       | 1.8%              |

---

|               |           |    |      |
|---------------|-----------|----|------|
| Calendar time | early-Sep | 70 | 1.8% |
| Calendar time | late-Dec  | 70 | 1.8% |
| Calendar time | mid-Feb   | 70 | 1.8% |

---

**Table S2.** Likelihood of having the same or higher frequency of anomalies during each calendar time as the observed, based on bootstrapping.

| <b>timing</b> | <b>number anomalies during this time</b> | <b>total number of anomalies</b> | <b>observed frequency</b> | <b>P-value: probability based on bootstrapping</b> |
|---------------|------------------------------------------|----------------------------------|---------------------------|----------------------------------------------------|
| early-Aug     | 24                                       | 198                              | 0.1212                    | 0.0000                                             |
| late-Jan      | 19                                       | 198                              | 0.0960                    | 0.0002                                             |
| late-Dec      | 11                                       | 198                              | 0.0556                    | 0.0008                                             |
| late-Nov      | 12                                       | 198                              | 0.0606                    | 0.0124                                             |
| early-May     | 12                                       | 198                              | 0.0606                    | 0.0138                                             |
| late-Apr      | 9                                        | 198                              | 0.0455                    | 0.0286                                             |
| mid-Nov       | 8                                        | 198                              | 0.0404                    | 0.0680                                             |
| late-Jun      | 9                                        | 198                              | 0.0455                    | 0.1292                                             |
| late-Aug      | 9                                        | 198                              | 0.0455                    | 0.5122                                             |
| mid-Jun       | 6                                        | 198                              | 0.0303                    | 0.5364                                             |
| late-Mar      | 6                                        | 198                              | 0.0303                    | 0.5380                                             |
| late-Feb      | 5                                        | 198                              | 0.0253                    | 0.5850                                             |
| early-Apr     | 5                                        | 198                              | 0.0253                    | 0.5860                                             |
| mid-Jul       | 7                                        | 198                              | 0.0354                    | 0.6134                                             |
| mid-Dec       | 6                                        | 198                              | 0.0303                    | 0.6546                                             |
| late-Jul      | 5                                        | 198                              | 0.0253                    | 0.7060                                             |
| mid-Feb       | 3                                        | 198                              | 0.0152                    | 0.7068                                             |
| early-Oct     | 3                                        | 198                              | 0.0152                    | 0.7148                                             |
| early-Dec     | 4                                        | 198                              | 0.0202                    | 0.7582                                             |
| early-Jan     | 4                                        | 198                              | 0.0202                    | 0.8450                                             |
| mid-Apr       | 4                                        | 198                              | 0.0202                    | 0.8490                                             |
| early-Jun     | 3                                        | 198                              | 0.0152                    | 0.8900                                             |
| early-Nov     | 3                                        | 198                              | 0.0152                    | 0.9384                                             |
| early-Mar     | 2                                        | 198                              | 0.0101                    | 0.9386                                             |
| late-May      | 3                                        | 198                              | 0.0152                    | 0.9634                                             |
| mid-Oct       | 3                                        | 198                              | 0.0152                    | 0.9634                                             |
| mid-Jan       | 2                                        | 198                              | 0.0101                    | 0.9686                                             |
| mid-Aug       | 2                                        | 198                              | 0.0101                    | 0.9720                                             |
| early-Jul     | 1                                        | 198                              | 0.0051                    | 0.9772                                             |
| mid-Sep       | 3                                        | 198                              | 0.0152                    | 0.9788                                             |
| late-Sep      | 2                                        | 198                              | 0.0101                    | 0.9830                                             |
| early-Feb     | 1                                        | 198                              | 0.0051                    | 0.9888                                             |
| late-Oct      | 1                                        | 198                              | 0.0051                    | 0.9924                                             |
| mid-Mar       | 1                                        | 198                              | 0.0051                    | 0.9956                                             |

**Table S3.** Estimated patterns of SARS-CoV-2 fecal viral shedding in wastewater, using RT-qPCR data alone through April 11, 2023. All estimates here are based on RT-qPCR measures.

| model                              | wave                                  | shedding rate (billion<br>copies per day per<br>infectious person, mean<br>and 95% confidence<br>interval) | lag<br>(days) | number<br>of<br>samples | adjusted<br>R <sup>2</sup> |
|------------------------------------|---------------------------------------|------------------------------------------------------------------------------------------------------------|---------------|-------------------------|----------------------------|
| Include<br>all<br>variant<br>waves | 2nd wave (08/31/20-<br>06/26/21)      | 1.45 (1.36, 1.54)                                                                                          | 0             | 3                       | 0.84                       |
|                                    | Delta wave (06/27/21-<br>12/04/21)    | 1.16 (0.88, 1.44)                                                                                          | 0             | 3                       | 0.84                       |
|                                    | Omicron period<br>(12/05/21-04/11/23) | 0.59 (0.58, 0.6)                                                                                           | 0             | 3                       | 0.84                       |
| Stratified<br>by wave/<br>period   | 2nd wave (08/31/20-<br>06/26/21)      | 1.44 (1.37, 1.52)                                                                                          | 0             | 4                       | 0.74                       |
|                                    | Delta wave (06/27/21-<br>12/04/21)    | 1.09 (0.91, 1.27)                                                                                          | -5            | 4                       | 0.37                       |
|                                    | Omicron period<br>(12/05/21-04/11/23) | 0.59 (0.58, 0.61)                                                                                          | 0             | 3                       | 0.86                       |
|                                    | Omicron BA.1<br>(12/05/21-03/05/22)   | 0.59 (0.56, 0.61)                                                                                          | 0             | 3                       | 0.91                       |
|                                    | After BA.1 (03/06/22-<br>04/11/23)    | 0.72 (0.69, 0.75)                                                                                          | -5            | 4                       | 0.76                       |

**Fig S1.** Per-capita wastewater SARS-CoV-2 viral load in each of the 14 NYC sewersheds during the 2<sup>nd</sup> wave. Dots showed aggregated wastewater SARS-CoV-2 viral load for each week. For comparison, we overlay the corresponding estimates of infection prevalence (blue line = median; darker blue area = 50% CI and lighter blue area = 95% CI). The sewersheds are ordered by the mean viral load during this time period (from the highest to the lowest).

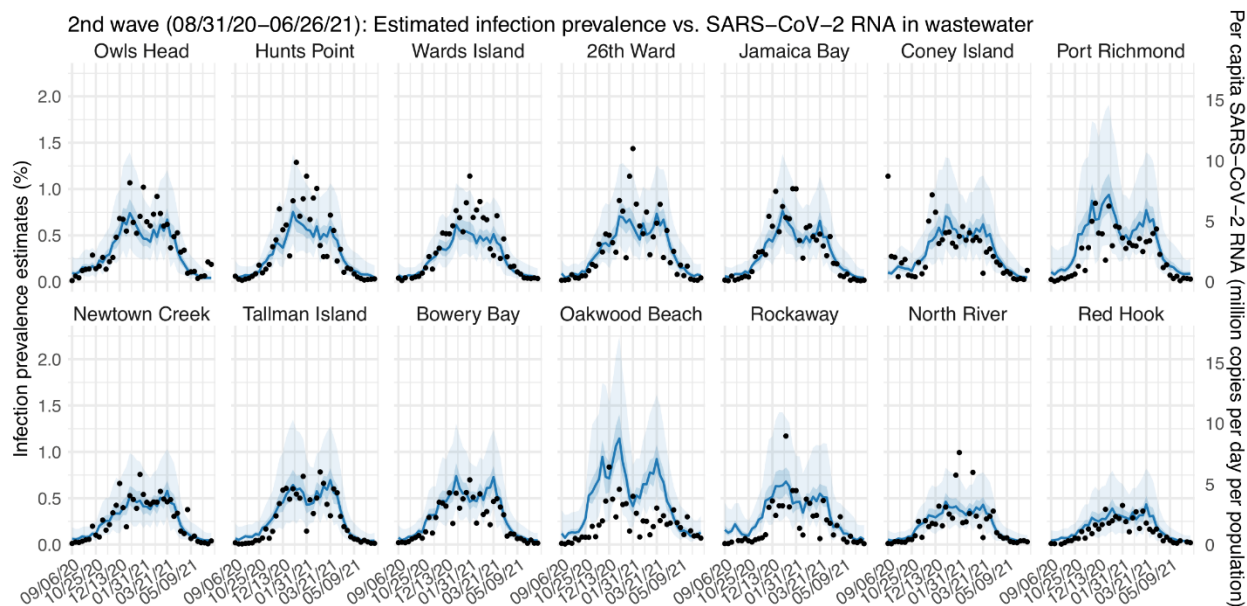

**Fig S2.** Per-capita wastewater SARS-CoV-2 viral load in each of the 14 NYC sewersheds during the Delta wave. Dots showed aggregated wastewater SARS-CoV-2 viral load for each week. For comparison, we overlay the corresponding estimates of infection prevalence (blue line = median; darker blue area = 50% CI and lighter blue area = 95% CI). The sewersheds are ordered by the mean viral load during this time period (from the highest to the lowest).

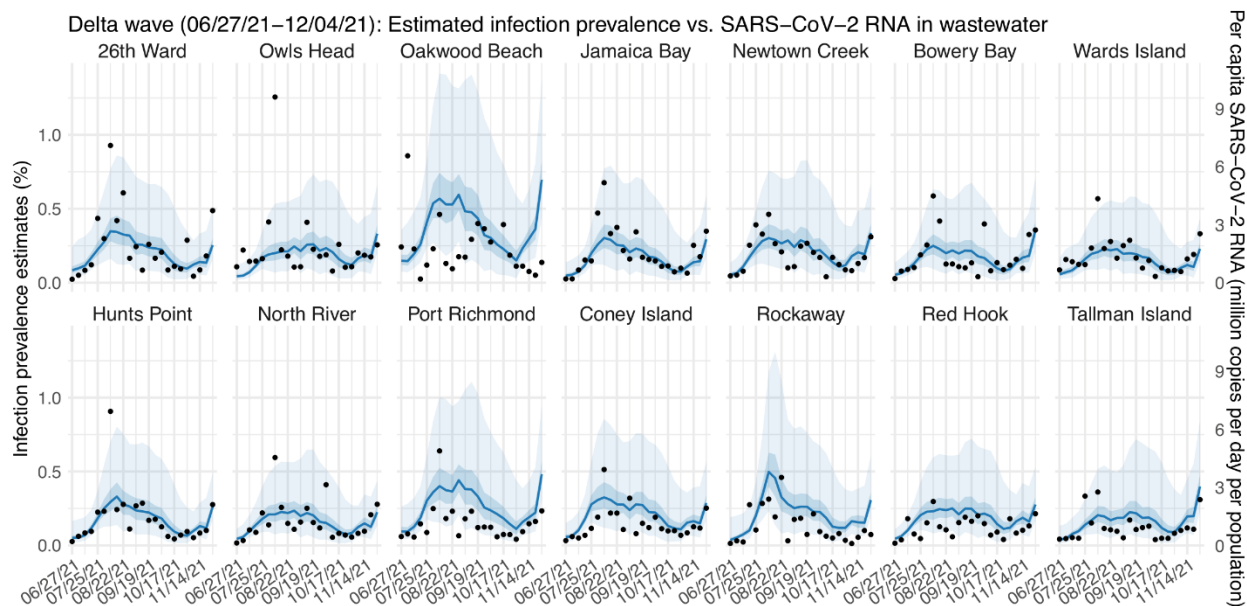

**Fig S3.** Per-capita wastewater SARS-CoV-2 viral load in each of the 14 NYC sewersheds during the Omicron period. Dots showed aggregated wastewater SARS-CoV-2 viral load for each week. For comparison, we overlay the corresponding estimates of infection prevalence (blue line = median; darker blue area = 50% CI and lighter blue area = 95% CI). The sewersheds are ordered by the mean viral load during this time period (from the highest to the lowest).

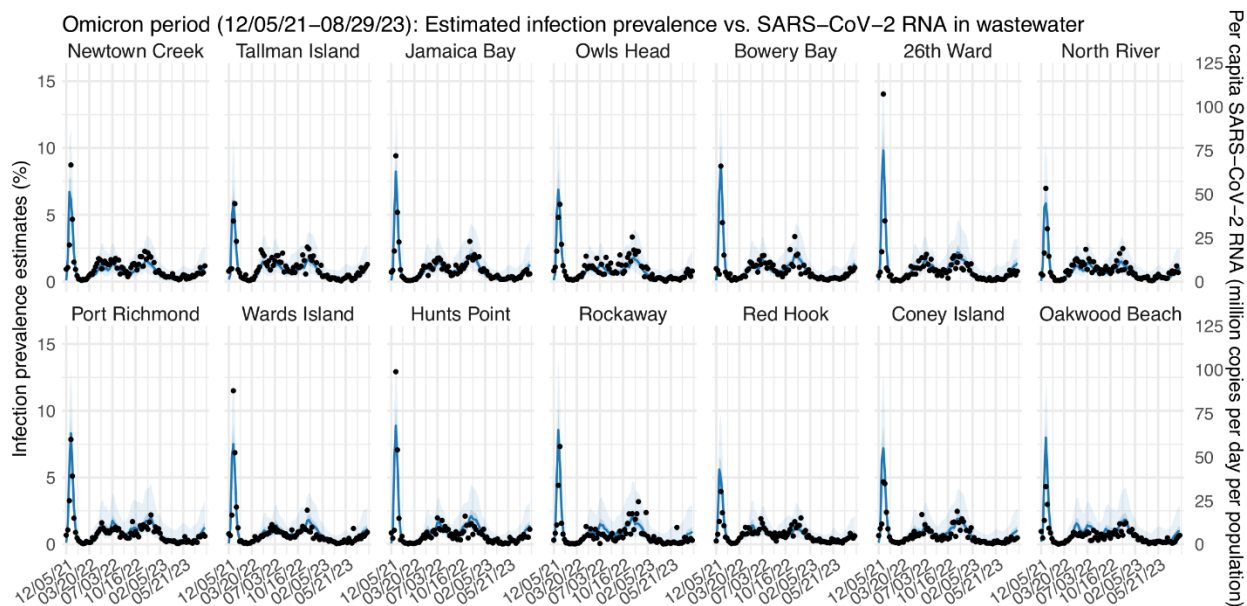



**Fig S4.** The total number of anomalies identified for each sewershed during the study period (n; see numbers in the map; darker colors indicate larger numbers).

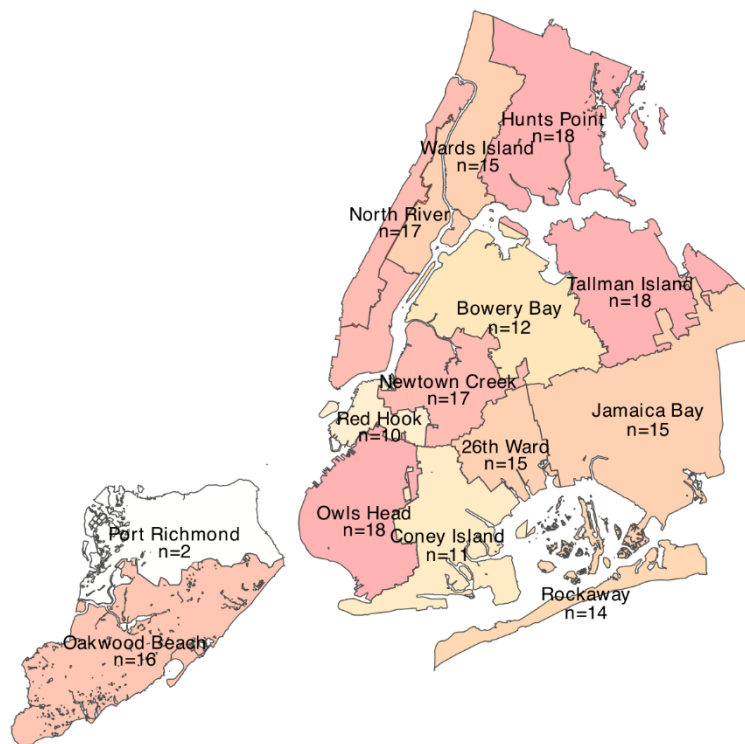

Source: https://medrxiv.org/content/10.1101/2024.08.02.24311410v1.full.pdf
